# Supplementary material for: Paclitaxel is necessary for improved survival in epithelial ovarian cancers with homologous recombination gene mutations
Source: PubMed Central journal article supplement (PMC5217039; doi:10.18632/oncotarget.9373), 2016-05-14
Supplement: oncotarget-07-48577-s001.pdf [file oncotarget-07-48577-s001.pdf]

## **Paclitaxel is necessary for improved survival in epithelial ovarian cancers with homologous recombination gene mutations**

### **Supplementary Material**

#### **Supplementary Table 1: All detected deleterious mutations**

For Table S1, please see the attached Excel file
